# Supplementary material
Source: Springer Nature journal article supplement (https://www.springermedizin.de/resource/supplementary/13601_2013_634_MOESM3_ESM.pdf/9677880)

**A**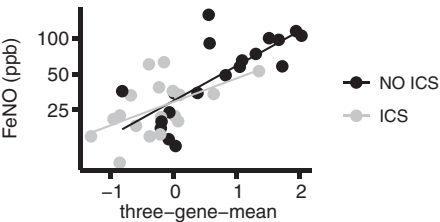**B**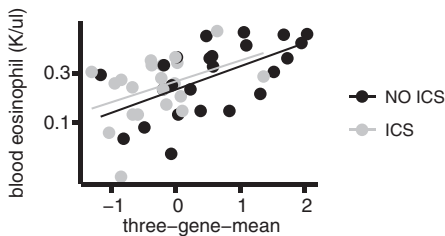**C**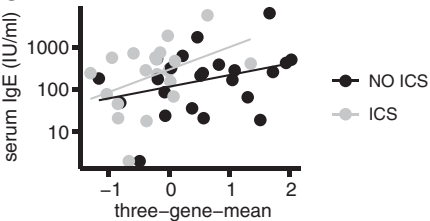**D**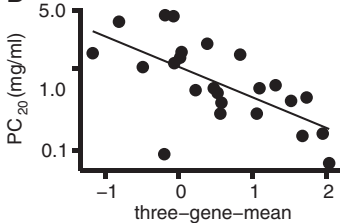

Supplement: MOESM3 [file 9677880]
